# Supplementary material for: Label-free detection and discrimination of poly-brominated diphenylethers using molecularly imprinted photonic cross-reactive sensor arrays
Source: Royal Society of Chemistry journal article supplement (doi:10.1039/c4cc05810k), 2014-01-01
Supplement: c4cc05810k1.pdf [file c4cc05810k1.pdf]

## Supporting Information for:

### **Label-Free Detection and Discrimination of Polybrominated Diphenyl-ethers Using Molecularly Imprinted Photonic Cross-Reactive Sensor Arrays**

Dan Xu<sup>‡,a</sup>, Wei Zhu<sup>‡,a</sup>, Chen Wang,<sup>a</sup> Tian Tian,<sup>a</sup> Jian Li,<sup>a</sup> Yue Lan,<sup>a</sup> Guangxin Zhang,<sup>b</sup> Deqing Zhang<sup>\*b</sup> and Guangtao Li<sup>\*a</sup>

<sup>a</sup>Key Lab of Organic Optoelectronics and Molecular Engineering, Department of Chemistry, Tsinghua University, 100084 Beijing, China; <sup>b</sup>Laboratory of Organic Solids, Institute of Chemistry, Chinese Academy of Sciences, Beijing, 100080, China.

E-mail: LGT@mail.tsinghua.edu.cn

## 1. Experimental section

### 1.1 *chemicals*

Acrylic acid (AA) and tetraethoxysilane (TEOS) were purchased from Beijing Chemical Industries., Five analytes: Bisphenol A (BPA), 3,3',5,5'-Tetrabromobisphenol A (TBBPA), 4,4'-Biphenol (BIP), 2,2'-Dibromodiphenyl ether (DBDE), 2,2',3,3'-Tetrabromodiphenyl ether (TBDE), 2,2',3,3',4,4',6,6'-Octabromodiphenyl ether (Octa-BDE), 2,2',3,3',4,4',5,5',6,6'-Decabromodiphenyl ether (Deca-BDE), methlenediethylene glycol dimethylacrylate (EGDMA), and 2, 2'-azobisisobutyronitrile (AIBN) were obtained from Arcos Organics. Anhydrous ethanol, ammonia, acetic acid, and other affiliated chemicals were all from local suppliers. All solvents and chemicals are of reagent quality and were used without further purification. Common glass slides were cut to be 50×20 mm<sup>2</sup> and immersed in a H<sub>2</sub>SO<sub>4</sub>/H<sub>2</sub>O<sub>2</sub> mixture for 12 h, followed by rinsing with deionized water in an ultrasonic bath three times and then dried prior to use. All 7-mL vials for the formation of colloidal-crystal templates were cleaned by rinsing with the H<sub>2</sub>SO<sub>4</sub>/H<sub>2</sub>O<sub>2</sub> mixture and deionized water. Polymethyl methacrylate (PMMA) slides (50 mm long, 20 mm wide and 1.5 mm thick) as supports for the formed MIPP film were cleaned with anhydrous ethanol. NaH<sub>2</sub>PO<sub>4</sub> and Na<sub>2</sub>HPO<sub>4</sub> were used as buffer solution at pH 7.6 for all molecular sensing measurements. The real lake water was obtained from a lake in Tsinghua University and filtered through a 200 μm syringe filter before use. Tap water was obtained from our lab without pretreatment before use.

### 1.2 *Instrumentation*

Morphology and microstructure of silica colloidal crystals and photonic hydrogel films was observed by a Hitachi S-6700 field emission scanning electron microscope. Optical Bragg diffractions were checked by an Olympus BX51M fiber optic spectrophotometer coupled to an optical microscope. The photopolymerization was performed in a UV light (FUSI Electric ST3) with 16 W. A centrifuging apparatus (Anke TDL-60B, Shanghai, China) was used for the centrifugation of colloidal particles from the reactants. The sensing properties of the fabricated MIPP films were checked by exposure to solutions of the analyte one after another from low to high concentrations in buffer solution. The shift of the Bragg diffraction wavelength of MIPP films after the exposure was measured by fiber optic spectrophotometer. Photograph of the MIPP films was obtained by using a common digital camera under a daylight lamp.

### 1.3 *Formation of colloidal-crystal templates*

The highly uniform silica colloidal microspheres were synthesized by using an approach based on the Stöber method. In a typical preparation, TEOS (4ml) and anhydrous ethanol (180 mL) were mixed in a 250-mL flask and stirred with a magnetic beater. Then, ammonia (17mL) was slowly added and the resulting reaction mixture was left overnight. After centrifugation and dispersion with anhydrous ethanol had been repeated four or five times to expunge residues, the monodispersed silica particles were obtained and fully dispersed in anhydrous ethanol (weight concentration ca. 1–4%), which were allotted into 7-mL clean vials for the formation of colloidal-crystal templates. A clean glass slide was

vertically placed into each vial for colloidal-crystal growth. After complete volatilization of ethanol, silica colloidal-crystal templates were formed on both sides of each glass slide.

#### 1.4 *Synthesis of molecularly imprinted sensing element*

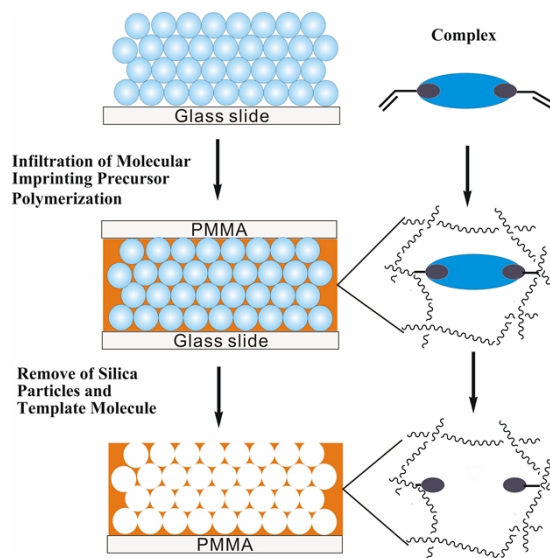

**Figure S1.** Illustration of the procedure used for the preparation of molecularly imprinted photonic sensing element.

#### 1.5 *The optimization of the ratio of template molecules and monomer*

The effect of different molar ratio of template to monomer on the imprinting effect was carefully investigated in our work. As shown in Figure S2, when the template (BPA) / functional monomer molar ratio was set to 1/7, BPA imprinted sensing element exhibited an optimized optical shift to BPA for 40 nm at  $10^{-6}$  M concentration. Whereas, for the ratio of 1/6 or 1/8, the redshift for 36 nm and 27 nm were observed, respectively. Clearly, in our system, the ratio of template to monomer could be used to adjust the affinity (or response) of the constructed sensing elements. In our work, an optimized molar ratio of template to functional monomer was set to 1/7 for creating MIPP sensing elements.

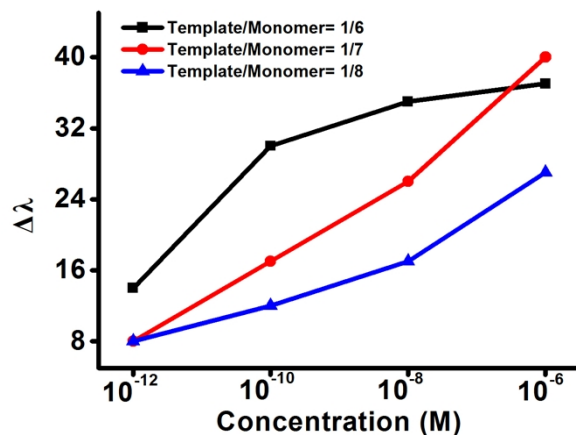

**Figure S2.** Plots of Bragg shifts of BPA-imprinted sensing element with different ratio of template and monomer to BPA under different concentration.

#### 1.6 The fabrication of MIPPs and NIPPs films

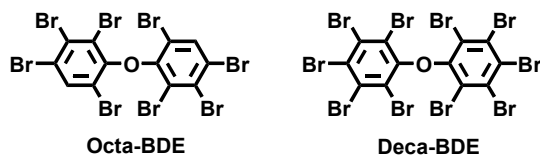

**Scheme S1.** Chemical structures of Octa-BDE and Deca-BDE.

Template molecule (1 mmol), 0.5 g of AA (7 mmol) and 0.19 g of EGDMA (1 mmol) were mixed overnight in 0.2 ml of acetone and 0.3 ml anhydrous ethanol solvent for sufficient complexation. After adding 0.01 g of AIBN (6.1 mmol) and degassing with nitrogen for 10 minutes, the homogeneous mixtures were individually dropped onto colloidal templates. Once the colloidal templates became transparent, indicating successful infiltration, excess precursors were removed by covering a clean PMMA slide, and the remaining mixtures were photopolymerized in an ice bath under a UV light at 365 nm for 2 h. The sandwiches were immersed into 1% hydrofluoric acid for 2 h to separate the double slides and fully etch the silica particles. After eluting by incubating in acetic acid and water (v/v=1: 9) for 6 h, the MIPPs films on PMMA slides were rinsed with a phosphate buffer (pH 7.6, 5 mM) for removal of the target molecules from the MIPPs films. Thus, these obtained MIPPs films were kept in buffer and ready for determination. NIPPs films were also prepared for control tests with no addition of template.

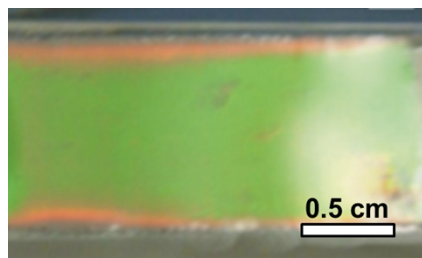

**Figure S3.** Photographs of molecularly imprinted inverse opal photonic film.

### 1.7 Examples of Sensor Array Responses at Different Analyte Concentrations

#### 1) BPA imprinted sensing element against five analytes

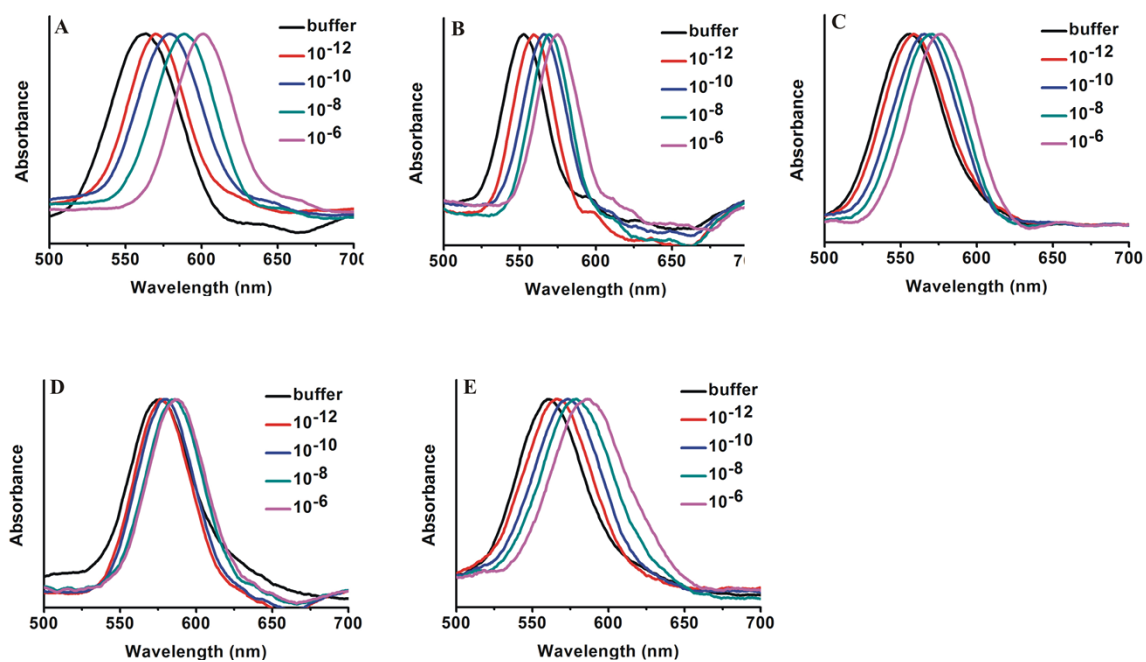

**Figure S4.** Optical response of BPA imprinted sensing element to different analytes with  $10^{-12}$  M- $10^{-6}$  M concentration range: A) BPA; B) TBBPA; C) BIP; D) DBDE; E) TBDE; All the spectra were normalized.

2) TBBPA imprinted sensing element against five analytes

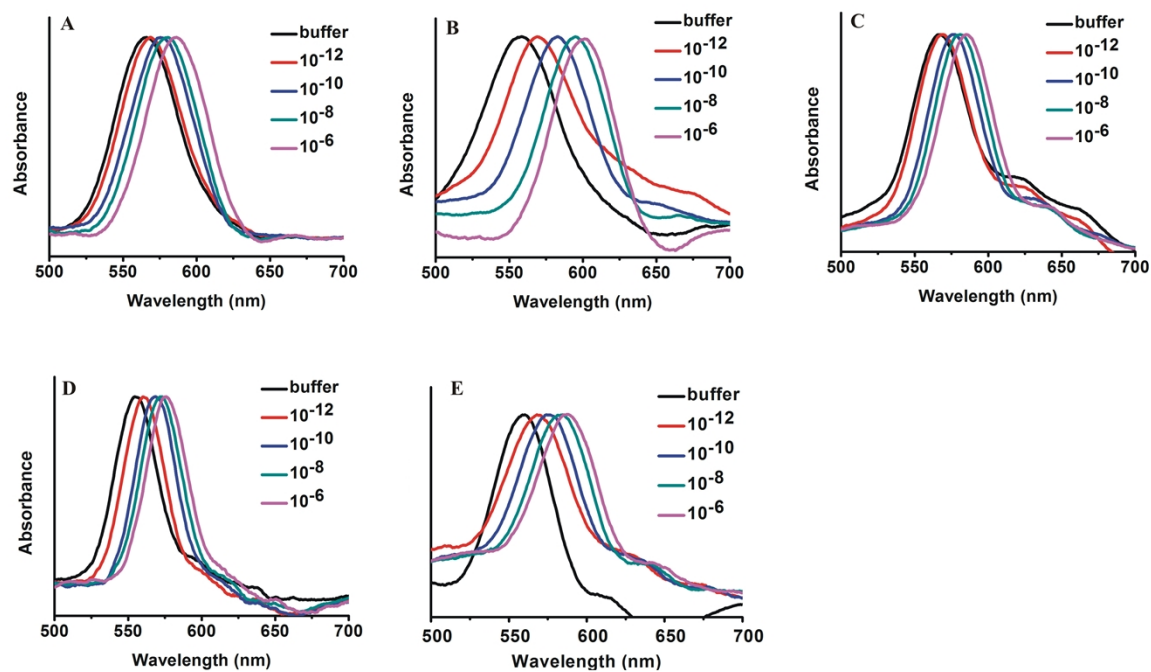

**Figure S5.** Optical response of TBBPA imprinted sensing element to different analytes with 10<sup>-12</sup> M-10<sup>-6</sup> M concentration range: A) BPA; B) TBBPA; C) BIP; D) DBDE; E) TBDE; All the spectra were normalized.

### 3) BIP imprinted sensing element against five analytes

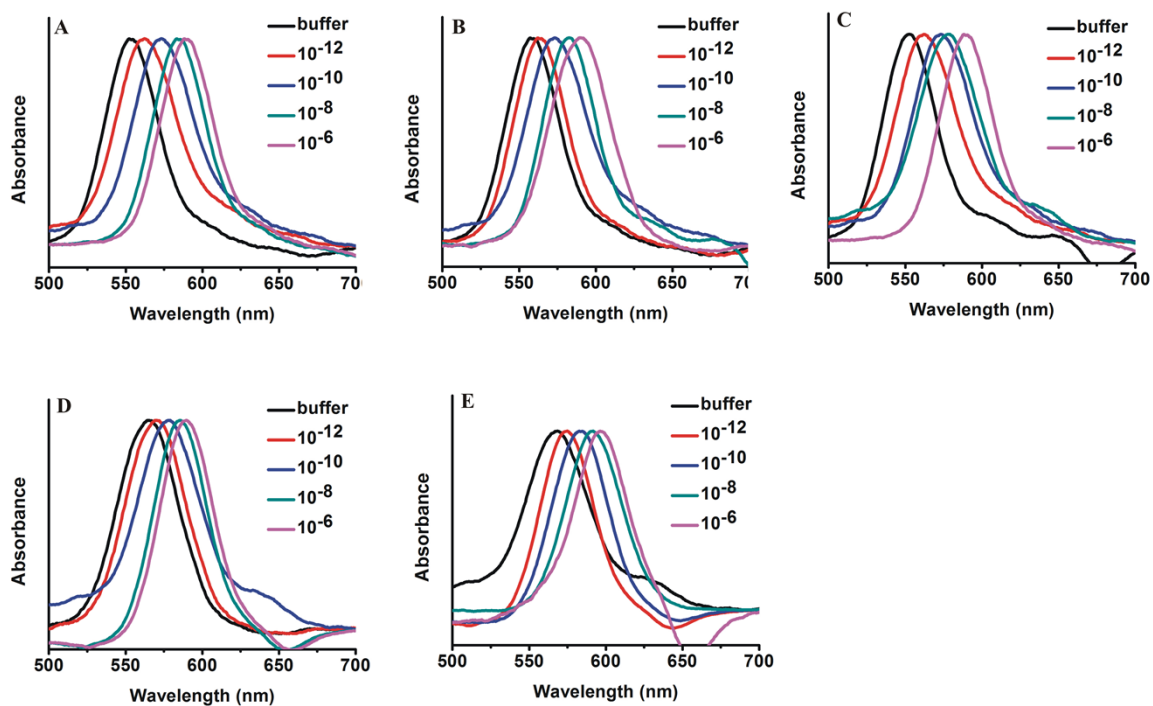

**Figure S6.** Optical response of BIP imprinted sensing element to different analytes with  $10^{-12}$  M- $10^{-6}$  M concentration range: A) BPA; B) TBBPA; C) BIP; D) DBDE; E) TBDE; All the spectra were normalized.

#### 4) Nonimprinted sensing element against five analytes

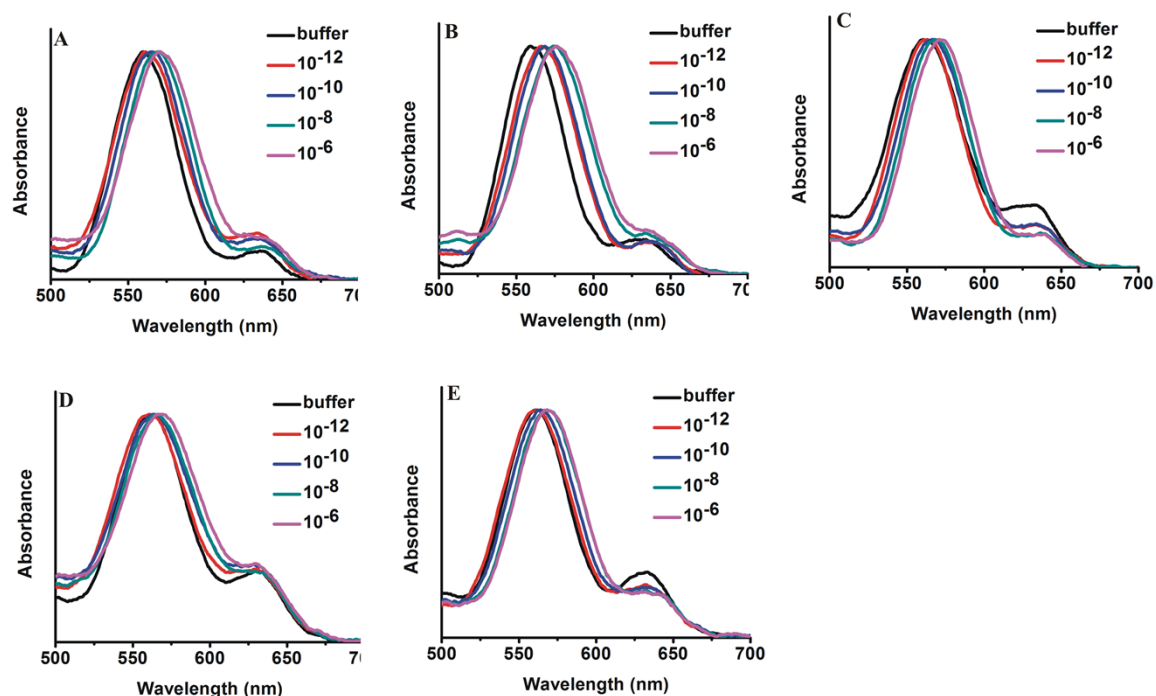

**Figure S7.** Optical response of nonimprinted sensing element to different analytes with  $10^{-12}$  M- $10^{-6}$  M concentration range: A) BPA; B) TBBPA; C) BIP; D) DBDE; E) TBDE; All the spectra were normalized.

## 2. Data analysis

To evaluate whether the recognition patterns can be applied for discrimination and identification, principal component analysis (PCA) and Leave-One-Out (or jack-knife) cross-validation procedure were used to perform multivariate analyses. For PCA, factor scores were used to draw 2D and 3D score plots. Jack-knifed classification matrices were taken to evaluate discrimination results. Each response was measured in five replicates.

**Table S1.** Bragg shifts (nm) of sensor array versus five analytes at concentration of  $10^{-8}$  M

| sensing elements | BPA imprinted polymer | TBBPA imprinted polymer | BIP imprinted polymer | Non imprinted polymer |
|------------------|-----------------------|-------------------------|-----------------------|-----------------------|
| BPA (1)          | 27                    | 15                      | 31                    | 9                     |
| BPA (2)          | 29                    | 14                      | 29                    | 8                     |
| BPA (3)          | 28                    | 16                      | 30                    | 7                     |
| BPA (4)          | 30                    | 17                      | 32                    | 8                     |
| BPA (5)          | 27                    | 14                      | 29                    | 7                     |

|           |    |    |    |    |
|-----------|----|----|----|----|
| TBBPA (1) | 17 | 37 | 29 | 15 |
| TBBPA (2) | 18 | 38 | 28 | 14 |
| TBBPA (3) | 16 | 36 | 27 | 13 |
| TBBPA (4) | 19 | 39 | 26 | 14 |
| TBBPA (5) | 16 | 38 | 27 | 15 |
| BIP (1)   | 14 | 15 | 25 | 7  |
| BIP (2)   | 16 | 13 | 27 | 6  |
| BIP (3)   | 15 | 14 | 26 | 8  |
| BIP (4)   | 14 | 12 | 28 | 9  |
| BIP (5)   | 16 | 14 | 27 | 8  |
| DBDE (1)  | 10 | 17 | 17 | 4  |
| DBDE (2)  | 9  | 18 | 19 | 5  |
| DBDE (3)  | 8  | 16 | 20 | 3  |
| DBDE (4)  | 10 | 19 | 18 | 5  |
| DBDE (5)  | 9  | 17 | 17 | 4  |
| TBDE (1)  | 17 | 19 | 26 | 8  |
| TBDE (2)  | 19 | 20 | 27 | 7  |
| TBDE (3)  | 20 | 18 | 25 | 6  |
| TBDE (4)  | 18 | 17 | 26 | 7  |
| TBDE (5)  | 18 | 18 | 27 | 6  |

**Table S2.** Variables contribution in the PCs (Concentration:  $10^{-8}$  M)

|           | PC1      | PC2     | PC3      |
|-----------|----------|---------|----------|
| BPA (1)   | -20.1332 | 38.2809 | -7.811   |
| BPA (2)   | -18.6908 | 38.9017 | -5.1753  |
| BPA (3)   | -20.3376 | 38.2271 | -5.4485  |
| BPA (4)   | -21.8044 | 40.9683 | -6.0083  |
| BPA (5)   | -18.3544 | 37.0825 | -5.7434  |
| TBBPA (1) | -42.5352 | 27.3763 | -9.4827  |
| TBBPA (2) | -43.0638 | 27.4607 | -7.5902  |
| TBBPA (3) | -40.7503 | 25.3375 | -7.9341  |
| TBBPA (4) | -43.822  | 27.17   | -5.4904  |
| TBBPA (5) | -43.2811 | 25.4045 | -8.4209  |
| BIP (1)   | -18.8379 | 23.9979 | -9.555   |
| BIP (2)   | -16.8326 | 26.7766 | -9.8545  |
| BIP (3)   | -18.3215 | 25.5945 | -10.4096 |
| BIP (4)   | -16.9462 | 26.128  | -13.2058 |
| BIP (5)   | -18.4222 | 26.9483 | -10.5677 |

|          |          |         |         |
|----------|----------|---------|---------|
| DBDE (1) | -18.9668 | 15.9056 | -4.3509 |
| DBDE (2) | -20.4152 | 16.1252 | -6.4676 |
| DBDE (3) | -17.9729 | 15.7309 | -7.177  |
| DBDE (4) | -21.268  | 16.3478 | -5.045  |
| DBDE (5) | -18.9607 | 15.065  | -4.8699 |
| TBDE (1) | -23.0399 | 26.7524 | -8.2391 |
| TBDE (2) | -23.7638 | 28.704  | -7.1819 |
| TBDE (3) | -21.3741 | 28.589  | -5.2917 |
| TBDE (4) | -20.8394 | 27.664  | -7.7032 |
| TBDE (5) | -21.5511 | 27.9346 | -7.684  |

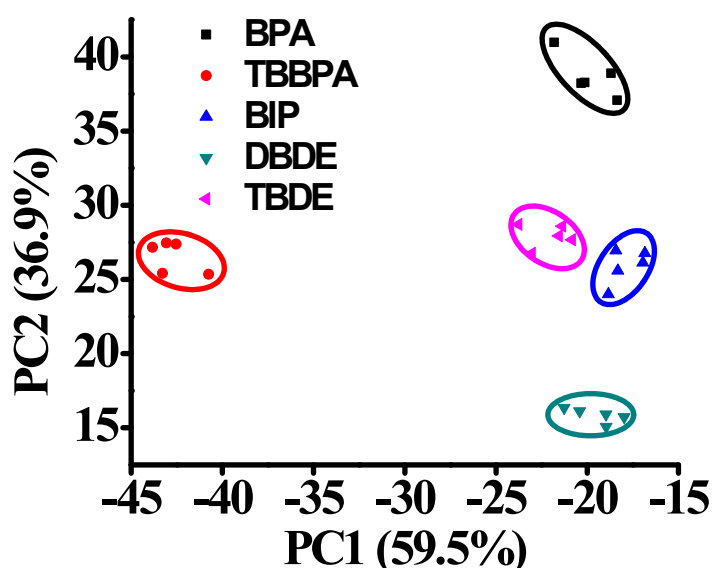

**Figure S8.** Two-dimensional PCA plot for the identification of five analytes ( $10^{-8}$  M) by MIPPs sensor array.

**Table S3.** Leave-One-Out cross-validation matrix (Concentration:  $10^{-8}$  M)

|            | BPA | TBBPA | BIP | DBDE | TBDE |
|------------|-----|-------|-----|------|------|
| BPA        | 5   | 0     | 0   | 0    | 0    |
| TBBPA      | 0   | 5     | 0   | 0    | 0    |
| BIP        | 0   | 0     | 5   | 0    | 0    |
| DBDE       | 0   | 0     | 0   | 5    | 0    |
| TBDE       | 0   | 0     | 0   | 0    | 5    |
| Total N    | 5   | 5     | 5   | 5    | 5    |
| N correct  | 5   | 5     | 5   | 5    | 5    |
| Proportion | 1   | 1     | 1   | 1    | 1    |

N=25   N Correct=25   Proportion Correct=1.00

**Table S4.** Bragg shifts (nm) of sensor array versus five analytes at concentration of  $10^{-10}$  M

| sensing elements | BPA<br>imprinted<br>polymer | TBBPA<br>imprinted<br>polymer | BIP<br>imprinted<br>polymer | Non<br>imprinted<br>polymer |
|------------------|-----------------------------|-------------------------------|-----------------------------|-----------------------------|
| BPA (1)          | 18                          | 11                            | 19                          | 6                           |
| BPA (2)          | 16                          | 10                            | 18                          | 5                           |
| BPA (3)          | 19                          | 12                            | 17                          | 6                           |
| BPA (4)          | 20                          | 10                            | 17                          | 4                           |
| BPA (5)          | 18                          | 11                            | 19                          | 5                           |
| TBBPA (1)        | 14                          | 25                            | 20                          | 9                           |
| TBBPA (2)        | 13                          | 25                            | 21                          | 9                           |
| TBBPA (3)        | 13                          | 26                            | 19                          | 7                           |
| TBBPA (4)        | 12                          | 24                            | 18                          | 7                           |
| TBBPA (5)        | 12                          | 26                            | 20                          | 7                           |
| BIP (1)          | 12                          | 8                             | 23                          | 2                           |
| BIP (2)          | 10                          | 9                             | 20                          | 4                           |
| BIP (3)          | 13                          | 10                            | 22                          | 3                           |
| BIP (4)          | 12                          | 9                             | 21                          | 4                           |
| BIP (5)          | 13                          | 10                            | 20                          | 2                           |
| DBDE (1)         | 5                           | 13                            | 13                          | 1                           |
| DBDE (2)         | 4                           | 12                            | 13                          | 0                           |
| DBDE (3)         | 6                           | 11                            | 11                          | 1                           |
| DBDE (4)         | 5                           | 13                            | 12                          | 1                           |
| DBDE (5)         | 4                           | 11                            | 14                          | 0                           |
| TBDE (1)         | 9                           | 14                            | 18                          | 3                           |
| TBDE (2)         | 10                          | 13                            | 16                          | 4                           |
| TBDE (3)         | 11                          | 12                            | 17                          | 4                           |
| TBDE (4)         | 8                           | 12                            | 18                          | 5                           |
| TBDE (5)         | 11                          | 13                            | 16                          | 3                           |

**Table S5.** Variables contribution in the PCs (Concentration:  $10^{-10}$  M)

|         | PC1      | PC2     | PC3     |
|---------|----------|---------|---------|
| BPA (1) | -20.9529 | 17.9318 | -7.745  |
| BPA (2) | -18.9376 | 16.2215 | -7.861  |
| BPA (3) | -21.6676 | 17.5189 | -5.4529 |

|           |          |         |          |
|-----------|----------|---------|----------|
| BPA (4)   | -19.5175 | 18.8619 | -5.1524  |
| BPA (5)   | -20.5935 | 17.7715 | -7.7642  |
| TBBPA (1) | -33.1351 | 9.5482  | -9.5636  |
| TBBPA (2) | -33.0633 | 9.1395  | -10.9095 |
| TBBPA (3) | -32.7701 | 7.6086  | -9.1165  |
| TBBPA (4) | -30.5432 | 7.289   | -8.8135  |
| TBBPA (5) | -32.6983 | 7.1998  | -10.4624 |
| BIP (1)   | -16.0692 | 15.3604 | -14.3093 |
| BIP (2)   | -16.4179 | 12.4875 | -12.4754 |
| BIP (3)   | -18.2208 | 15.0632 | -12.8225 |
| BIP (4)   | -17.2135 | 14.4707 | -12.4394 |
| BIP (5)   | -17.4268 | 14.1257 | -11.0711 |
| DBDE (1)  | -15.8136 | 3.5675  | -8.3957  |
| DBDE (2)  | -14.3049 | 3.043   | -8.9364  |
| DBDE (3)  | -13.9476 | 4.454   | -6.2862  |
| DBDE (4)  | -15.5963 | 3.179   | -7.5104  |
| DBDE (5)  | -13.662  | 3.8647  | -9.8825  |
| TBDE (1)  | -19.6359 | 8.5871  | -10.8805 |
| TBDE (2)  | -18.9895 | 9.2007  | -8.6909  |
| TBDE (3)  | -18.6357 | 10.8198 | -9.1764  |
| TBDE (4)  | -18.345  | 8.9767  | -11.4244 |
| TBDE (5)  | -18.9192 | 9.8377  | -8.2495  |

**Table S6.** Leave-One-Out cross-validation matrix (Concentration:  $10^{-10}$  M)

|            | BPA | TBBPA | BIP | DBDE | TBDE |
|------------|-----|-------|-----|------|------|
| BPA        | 5   | 0     | 0   | 0    | 0    |
| TBBPA      | 0   | 5     | 0   | 0    | 0    |
| BIP        | 0   | 0     | 5   | 0    | 0    |
| DBDE       | 0   | 0     | 0   | 5    | 0    |
| TBDE       | 0   | 0     | 0   | 0    | 5    |
| Total N    | 5   | 5     | 5   | 5    | 5    |
| N correct  | 5   | 5     | 5   | 5    | 5    |
| Proportion | 1   | 1     | 1   | 1    | 1    |

N=25 N Correct=25 Proportion Correct=1.00

**Table S7.** Bragg shifts (nm) of sensor array versus five analytes at concentration of  $10^{-12}$  M

| sensing elements | BPA<br>imprinted<br>polymer | TBBPA<br>imprinted<br>polymer | BIP<br>imprinted<br>polymer | Non<br>imprinted<br>polymer |
|------------------|-----------------------------|-------------------------------|-----------------------------|-----------------------------|
| BPA (1)          | 9                           | 4                             | 9                           | 2                           |
| BPA (2)          | 7                           | 5                             | 10                          | 3                           |
| BPA (3)          | 8                           | 6                             | 10                          | 2                           |
| BPA (4)          | 10                          | 4                             | 9                           | 1                           |
| BPA (5)          | 9                           | 4                             | 8                           | 3                           |
| TBBPA (1)        | 7                           | 11                            | 10                          | 7                           |
| TBBPA (2)        | 6                           | 10                            | 9                           | 6                           |
| TBBPA (3)        | 5                           | 9                             | 9                           | 5                           |
| TBBPA (4)        | 7                           | 9                             | 8                           | 5                           |
| TBBPA (5)        | 7                           | 8                             | 8                           | 5                           |
| BIP (1)          | 3                           | 2                             | 8                           | 2                           |
| BIP (2)          | 4                           | 3                             | 8                           | 2                           |
| BIP (3)          | 5                           | 4                             | 9                           | 3                           |
| BIP (4)          | 4                           | 5                             | 7                           | 1                           |
| BIP (5)          | 3                           | 3                             | 9                           | 1                           |
| DBDE (1)         | 2                           | 5                             | 7                           | -2                          |
| DBDE (2)         | 3                           | 6                             | 6                           | 0                           |
| DBDE (3)         | 4                           | 7                             | 5                           | 0                           |
| DBDE (4)         | 2                           | 5                             | 6                           | -1                          |
| DBDE (5)         | 3                           | 4                             | 5                           | 0                           |
| TBDE (1)         | 5                           | 7                             | 8                           | 0                           |
| TBDE (2)         | 5                           | 6                             | 7                           | 1                           |
| TBDE (3)         | 4                           | 5                             | 6                           | 1                           |
| TBDE (4)         | 4                           | 7                             | 6                           | 2                           |
| TBDE (5)         | 6                           | 7                             | 7                           | 0                           |

**Table S8.** Variables contribution in the PCs (Concentration:  $10^{-12}$  M)

|           | PC1      | PC2     | PC3     |
|-----------|----------|---------|---------|
| BPA (1)   | -10.6693 | 5.33    | -2.3143 |
| BPA (2)   | -11.0887 | 3.6273  | -0.5798 |
| BPA (3)   | -11.4596 | 3.6105  | -2.1652 |
| BPA (4)   | -10.5485 | 6.0318  | -3.4964 |
| BPA (5)   | -10.9832 | 4.9107  | -2.0877 |
| TBBPA (1) | -16.5616 | -1.0615 | -0.6037 |

|           |          |         |         |
|-----------|----------|---------|---------|
| TBBPA (2) | -14.6124 | -1.1811 | -0.5883 |
| TBBPA (3) | -12.9801 | -0.9757 | -0.2007 |
| TBBPA (4) | -13.6831 | -0.0859 | -1.7395 |
| TBBPA (5) | -13.1914 | 0.6327  | -1.3363 |
| BIP (1)   | -6.3095  | 2.7974  | 1.6195  |
| BIP (2)   | -7.3111  | 2.6862  | 0.633   |
| BIP (3)   | -9.2603  | 2.8059  | 0.6177  |
| BIP (4)   | -7.3468  | 1.0182  | -1.1445 |
| BIP (5)   | -6.4873  | 2.4982  | 0.9897  |
| DBDE (1)  | -4.4347  | 0.0861  | -1.7745 |
| DBDE (2)  | -6.3809  | -0.5387 | -1.9355 |
| DBDE (3)  | -7.0657  | -0.975  | -3.2943 |
| DBDE (4)  | -4.7486  | -0.3333 | -1.5479 |
| DBDE (5)  | -5.0808  | 0.5734  | -1.5014 |
| TBDE (1)  | -8.5262  | 0.6078  | -2.7608 |
| TBDE (2)  | -8.3484  | 0.907   | -2.131  |
| TBDE (3)  | -7.03    | 0.6931  | -1.5168 |
| TBDE (4)  | -8.644   | -0.8384 | -1.7243 |
| TBDE (5)  | -8.7193  | 0.8902  | -3.7163 |

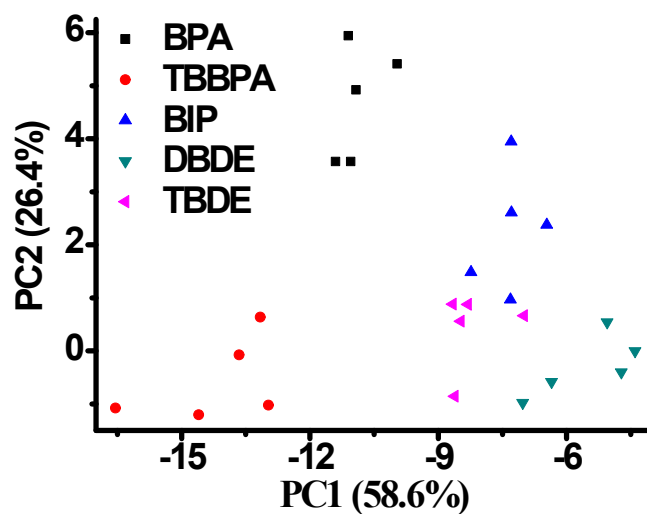

**Figure S9.** Two-dimensional PCA plot for the identification of five analytes ( $10^{-12}$  M) by MIPPs sensor array.

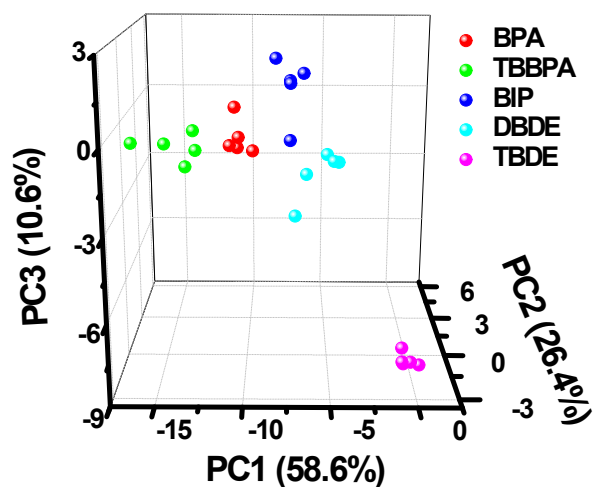

**Figure S10.** Three-dimensional PCA plot for the identification of five analytes ( $10^{-12}$  M) by MIPPs sensor array.

**Table S9.** Leave-One-Out cross-validation matrix (Concentration:  $10^{-12}$  M)

|            | BPA | TBBPA | BIP | DBDE | TBDE |
|------------|-----|-------|-----|------|------|
| BPA        | 5   | 0     | 0   | 0    | 0    |
| TBBPA      | 0   | 5     | 0   | 0    | 0    |
| BIP        | 0   | 0     | 5   | 0    | 0    |
| DBDE       | 0   | 0     | 0   | 5    | 0    |
| TBDE       | 0   | 0     | 0   | 0    | 5    |
| Total N    | 5   | 5     | 5   | 5    | 5    |
| N correct  | 5   | 5     | 5   | 5    | 5    |
| Proportion | 1   | 1     | 1   | 1    | 1    |

N=25   N Correct=25   Proportion Correct=1.00

**Table S10.** Bragg shifts (nm) of sensor array versus mixture at concentration of  $10^{-10}$  M of each analyte; 1: TBDE solution; mixture 2: (TBDE and BPA); mixture 3: (TBDE, BPA, and TBBPA); mixture 4: (TBDE, BPA, TBBPA and BIP)

| sensing elements | BPA<br>imprinted polymer | TBBPA<br>imprinted polymer | BIP<br>imprinted polymer |
|------------------|--------------------------|----------------------------|--------------------------|
| 1-1              | 10                       | 11                         | 20                       |
| 1-2              | 13                       | 12                         | 20                       |

|     |    |    |    |
|-----|----|----|----|
| 1-3 | 12 | 13 | 22 |
| 1-4 | 11 | 13 | 22 |
| 1-5 | 11 | 12 | 23 |
| 2-1 | 18 | 16 | 27 |
| 2-2 | 19 | 17 | 26 |
| 2-3 | 20 | 15 | 26 |
| 2-4 | 19 | 17 | 25 |
| 2-5 | 18 | 16 | 26 |
| 3-1 | 25 | 22 | 35 |
| 3-2 | 24 | 22 | 33 |
| 3-3 | 22 | 24 | 31 |
| 3-4 | 23 | 26 | 33 |
| 3-5 | 22 | 24 | 32 |
| 4-1 | 31 | 19 | 45 |
| 4-2 | 30 | 21 | 40 |
| 4-3 | 27 | 23 | 41 |
| 4-4 | 29 | 20 | 42 |
| 4-5 | 30 | 22 | 43 |

**Table S11.** Leave-One-Out cross-validation matrix (mixture at concentration of  $10^{-10}$  M)

|            | 1 | 2 | 3 | 4 |
|------------|---|---|---|---|
| 1          | 5 | 0 | 0 | 0 |
| 2          | 0 | 5 | 0 | 0 |
| 3          | 0 | 0 | 5 | 0 |
| 4          | 0 | 0 | 0 | 5 |
| Total N    | 5 | 5 | 5 | 5 |
| N correct  | 5 | 5 | 5 | 5 |
| Proportion | 1 | 1 | 1 | 1 |

N=20   N Correct=20   Proportion Correct=1.00

**Table S12.** Bragg shifts (nm) of sensor array versus mixture at concentration of  $10^{-10}$  M of each analyte dissolved in tap water; 1: TBDE solution; mixture 2: (TBDE and BPA); mixture 3: (TBDE, BPA, and TBBPA); mixture 4: (TBDE, BPA, TBBPA, BIP and Octa-BDE) and mixture 5 (TBDE, BPA, TBBPA, BIP, Octa-BDE and Deca-BDE); For Octa-BDE and Deca-BDE, saturated solution were used.

| sensing elements | BPA<br>imprinted polymer | TBBPA<br>imprinted polymer | BIP<br>imprinted polymer |
|------------------|--------------------------|----------------------------|--------------------------|
| 1-1              | 7                        | 7                          | 8                        |
| 1-2              | 8                        | 9                          | 10                       |
| 1-3              | 10                       | 8                          | 11                       |
| 1-4              | 8                        | 10                         | 9                        |
| 1-5              | 7                        | 8                          | 8                        |
| 2-1              | 14                       | 13                         | 20                       |
| 2-2              | 12                       | 10                         | 19                       |
| 2-3              | 13                       | 11                         | 22                       |
| 2-4              | 12                       | 12                         | 20                       |
| 2-5              | 14                       | 10                         | 20                       |
| 3-1              | 22                       | 24                         | 26                       |
| 3-2              | 20                       | 21                         | 24                       |
| 3-3              | 23                       | 22                         | 24                       |
| 3-4              | 22                       | 21                         | 25                       |
| 3-5              | 20                       | 24                         | 27                       |
| 4-1              | 27                       | 34                         | 34                       |
| 4-2              | 25                       | 31                         | 31                       |
| 4-3              | 27                       | 32                         | 34                       |
| 4-4              | 25                       | 32                         | 32                       |
| 4-5              | 25                       | 31                         | 31                       |
| 5-1              | 32                       | 40                         | 42                       |
| 5-2              | 30                       | 37                         | 39                       |
| 5-3              | 29                       | 38                         | 40                       |
| 5-4              | 30                       | 40                         | 41                       |
| 5-5              | 29                       | 40                         | 43                       |
| 6-1              | 34                       | 46                         | 50                       |
| 6-2              | 32                       | 45                         | 49                       |
| 6-3              | 31                       | 47                         | 48                       |
| 6-4              | 31                       | 48                         | 48                       |
| 6-5              | 34                       | 45                         | 51                       |

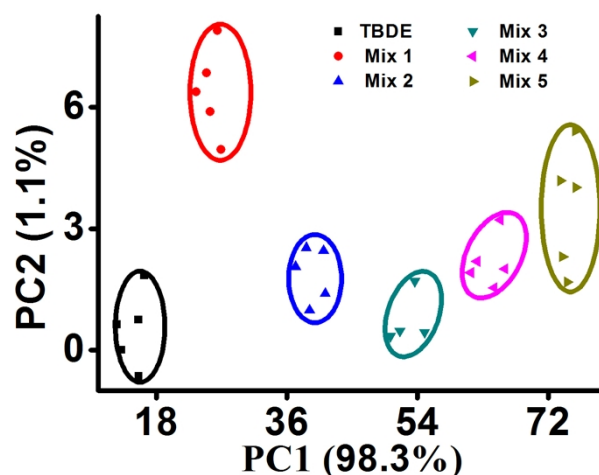

**Figure S11.** 2D PCA plot for the identification of TBDE and five different mixtures dissolved in tap water at concentration of  $10^{-10}$  M by MIPPs sensor array: mixture 1 (TBDE and BPA); mixture 2 (TBDE, BPA, and TBBPA); mixture 3 (TBDE, BPA, TBBPA and BIP); mixture 4 (TBDE, BPA, TBBPA, BIP and Octa-BDE) and mixture 5 (TBDE, BPA, TBBPA, BIP, Octa-BDE and Deca-BDE); For Octa-BDE and Deca-BDE, saturated solution were used.

**Table S13** Leave-One-Out cross-validation matrix (mixture at concentration of  $10^{-10}$  M)

|            | 1 | 2 | 3 | 4 | 5 | 6 |
|------------|---|---|---|---|---|---|
| 1          | 5 | 0 | 0 | 0 | 0 | 0 |
| 2          | 0 | 5 | 0 | 0 | 0 | 0 |
| 3          | 0 | 0 | 5 | 0 | 0 | 0 |
| 4          | 0 | 0 | 0 | 5 | 0 | 0 |
| 5          | 0 | 0 | 0 | 0 | 5 | 0 |
| 6          | 0 | 0 | 0 | 0 | 0 | 5 |
| Total N    | 5 | 5 | 5 | 5 | 5 | 5 |
| N correct  | 5 | 5 | 5 | 5 | 5 | 5 |
| Proportion | 1 | 1 | 1 | 1 | 1 | 1 |

N=30   N Correct=30   Proportion Correct=1.00

**Table S14.** Bragg shifts (nm) of sensor array versus mixture at concentration of  $10^{-10}$  M of each analyte dissolved in lake water; 1: TBDE solution; mixture 2: (TBDE and BPA); mixture 3: (TBDE, BPA, and TBBPA); mixture 4: (TBDE, BPA, TBBPA, BIP and Octa-BDE) and mixture 5 (TBDE, BPA, TBBPA, BIP, Octa-BDE and Deca-BDE); For Octa-BDE and Deca-BDE, saturated solution were used.

| sensing elements | BPA<br>imprinted polymer | TBBPA<br>imprinted polymer | BIP<br>imprinted polymer |
|------------------|--------------------------|----------------------------|--------------------------|
| 1-1              | 10                       | 15                         | 12                       |
| 1-2              | 11                       | 13                         | 9                        |
| 1-3              | 8                        | 12                         | 11                       |
| 1-4              | 8                        | 12                         | 9                        |
| 1-5              | 9                        | 13                         | 10                       |
| 2-1              | 15                       | 19                         | 20                       |
| 2-2              | 15                       | 16                         | 17                       |
| 2-3              | 14                       | 18                         | 18                       |
| 2-4              | 13                       | 17                         | 17                       |
| 2-5              | 13                       | 16                         | 20                       |
| 3-1              | 17                       | 23                         | 30                       |
| 3-2              | 14                       | 22                         | 28                       |
| 3-3              | 15                       | 22                         | 27                       |
| 3-4              | 16                       | 21                         | 28                       |
| 3-5              | 17                       | 21                         | 30                       |
| 4-1              | 28                       | 22                         | 38                       |
| 4-2              | 27                       | 20                         | 36                       |
| 4-3              | 27                       | 21                         | 37                       |
| 4-4              | 29                       | 20                         | 34                       |
| 4-5              | 30                       | 23                         | 38                       |
| 5-1              | 32                       | 26                         | 40                       |
| 5-2              | 31                       | 24                         | 40                       |
| 5-3              | 30                       | 24                         | 42                       |
| 5-4              | 30                       | 25                         | 39                       |
| 5-5              | 31                       | 25                         | 42                       |
| 6-1              | 42                       | 37                         | 51                       |
| 6-2              | 39                       | 36                         | 50                       |
| 6-3              | 41                       | 34                         | 52                       |
| 6-4              | 39                       | 34                         | 52                       |
| 6-5              | 40                       | 35                         | 50                       |

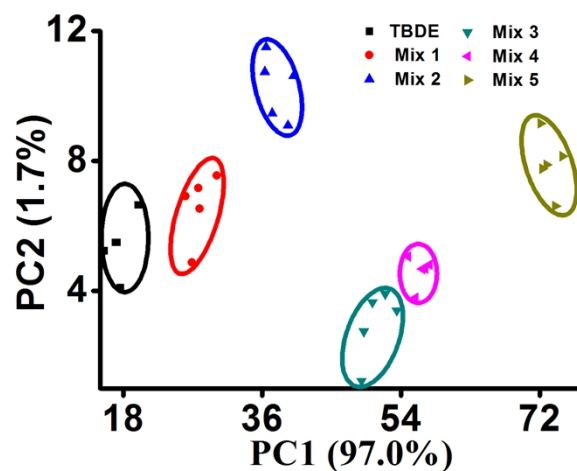

**Figure S12.** 2D PCA plot for the identification of TBDE and five different mixtures dissolved in lake water at concentration of  $10^{-10}$  M by MIPPs sensor array: mixture 1 (TBDE and BPA); mixture 2 (TBDE, BPA, and TBBPA); mixture 3 (TBDE, BPA, TBBPA and BIP); mixture 4 (TBDE, BPA, TBBPA, BIP and Octa-BDE) and mixture 5 (TBDE, BPA, TBBPA, BIP, Octa-BDE and Deca-BDE); For Octa-BDE and Deca-BDE, saturated solution were used.

**Table S15.** Leave-One-Out cross-validation matrix (mixture at concentration of  $10^{-10}$  M)

|            | 1 | 2 | 3 | 4 | 5 | 6 |
|------------|---|---|---|---|---|---|
| 1          | 5 | 0 | 0 | 0 | 0 | 0 |
| 2          | 0 | 5 | 0 | 0 | 0 | 0 |
| 3          | 0 | 0 | 5 | 0 | 0 | 0 |
| 4          | 0 | 0 | 0 | 5 | 0 | 0 |
| 5          | 0 | 0 | 0 | 0 | 5 | 0 |
| 6          | 0 | 0 | 0 | 0 | 0 | 5 |
| Total N    | 5 | 5 | 5 | 5 | 5 | 5 |
| N correct  | 5 | 5 | 5 | 5 | 5 | 5 |
| Proportion | 1 | 1 | 1 | 1 | 1 | 1 |

N=30 N Correct=30 Proportion Correct=1.00

**Table S16.** Bragg shifts (nm) of sensor array versus mixture dissolved in tap water; mixture 1: ( $10^{-12}$  M TBDE,  $10^{-10}$  M BPA, and  $10^{-10}$  M TBBPA); mixture 2: ( $10^{-10}$  M TBDE,  $10^{-10}$  M BPA, and  $10^{-10}$  M TBBPA); mixture 3: ( $10^{-8}$  M TBDE,  $10^{-10}$  M BPA, and  $10^{-10}$  M TBBPA); mixture 4: ( $10^{-12}$  TBDE,  $10^{-10}$  M BPA,  $10^{-10}$  M TBBPA and  $10^{-10}$  M BIP), mixture 5: ( $10^{-10}$  TBDE,  $10^{-10}$  M BPA,  $10^{-10}$  M TBBPA and  $10^{-10}$  M BIP) and mixture 6: ( $10^{-8}$  TBDE,  $10^{-10}$  M BPA,  $10^{-10}$  M TBBPA and  $10^{-10}$  M BIP).

| sensing elements | BPA<br>imprinted polymer | TBBPA<br>imprinted polymer | BIP<br>imprinted polymer |
|------------------|--------------------------|----------------------------|--------------------------|
| 1-1              | 10                       | 11                         | 7                        |
| 1-2              | 9                        | 13                         | 9                        |
| 1-3              | 7                        | 12                         | 10                       |
| 1-4              | 7                        | 11                         | 9                        |
| 1-5              | 9                        | 13                         | 10                       |
| 2-1              | 17                       | 20                         | 36                       |
| 2-2              | 14                       | 19                         | 33                       |
| 2-3              | 15                       | 19                         | 34                       |
| 2-4              | 16                       | 21                         | 38                       |
| 2-5              | 17                       | 21                         | 38                       |
| 3-1              | 24                       | 29                         | 40                       |
| 3-2              | 27                       | 30                         | 42                       |
| 3-3              | 26                       | 31                         | 40                       |
| 3-4              | 25                       | 30                         | 40                       |
| 3-5              | 24                       | 31                         | 42                       |
| 4-1              | 14                       | 16                         | 20                       |
| 4-2              | 15                       | 17                         | 22                       |
| 4-3              | 16                       | 18                         | 23                       |
| 4-4              | 15                       | 18                         | 22                       |
| 4-5              | 16                       | 17                         | 20                       |
| 5-1              | 28                       | 20                         | 34                       |
| 5-2              | 27                       | 19                         | 31                       |
| 5-3              | 26                       | 20                         | 34                       |
| 5-4              | 27                       | 20                         | 32                       |
| 5-5              | 29                       | 22                         | 36                       |
| 6-1              | 36                       | 26                         | 43                       |
| 6-2              | 35                       | 29                         | 45                       |
| 6-3              | 36                       | 28                         | 42                       |
| 6-4              | 36                       | 26                         | 43                       |
| 6-5              | 33                       | 29                         | 45                       |

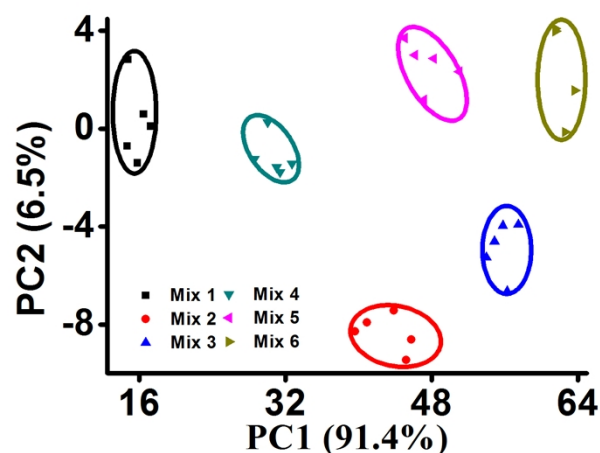

**Figure S13.** 2D PCA plot for the identification of six different mixtures dissolved in tap water by MIPPs sensor array: mixture 1: ( $10^{-12}$  M TBDE,  $10^{-10}$  M BPA, and  $10^{-10}$  M TBBPA); mixture 2: ( $10^{-10}$  M TBDE,  $10^{-10}$  M BPA, and  $10^{-10}$  M TBBPA); mixture 3: ( $10^{-8}$  M TBDE,  $10^{-10}$  M BPA, and  $10^{-10}$  M TBBPA); mixture 4: ( $10^{-12}$  TBDE,  $10^{-10}$  M BPA,  $10^{-10}$  M TBBPA and  $10^{-10}$  M BIP), mixture 5: ( $10^{-10}$  TBDE,  $10^{-10}$  M BPA,  $10^{-10}$  M TBBPA and  $10^{-10}$  M BIP) and mixture 6: ( $10^{-8}$  TBDE,  $10^{-10}$  M BPA,  $10^{-10}$  M TBBPA and  $10^{-10}$  M BIP).

**Table S17.** Leave-One-Out cross-validation matrix six different mixtures

|            | 1 | 2 | 3 | 4 | 5 | 6 |
|------------|---|---|---|---|---|---|
| 1          | 5 | 0 | 0 | 0 | 0 | 0 |
| 2          | 0 | 5 | 0 | 0 | 0 | 0 |
| 3          | 0 | 0 | 5 | 0 | 0 | 0 |
| 4          | 0 | 0 | 0 | 5 | 0 | 0 |
| 5          | 0 | 0 | 0 | 0 | 5 | 0 |
| 6          | 0 | 0 | 0 | 0 | 0 | 5 |
| Total N    | 5 | 5 | 5 | 5 | 5 | 5 |
| N correct  | 5 | 5 | 5 | 5 | 5 | 5 |
| Proportion | 1 | 1 | 1 | 1 | 1 | 1 |

N=30   N Correct=30   Proportion Correct=1.00
